# Supplementary material
Source: publisher figshare collection journal article supplement (https://acs.figshare.com/ndownloader/files/26300965)
Supplement: Supplementary file 1 [file 26300965]

## Supporting Information

### Controlled Osteogenic Differentiation of Human Mesenchymal Stem Cells Using Dexamethasone-Loaded Light-Responsive Microgels

Yingnan Zhang, Changhao Fang, Shuce Zhang, Robert E. Campbell and Michael J.  
Serpe\*

Department of Chemistry, University of Alberta, Edmonton, AB, T6G 2G2

Phone:(780) 492-5778, Email: serpe@ualberta.ca

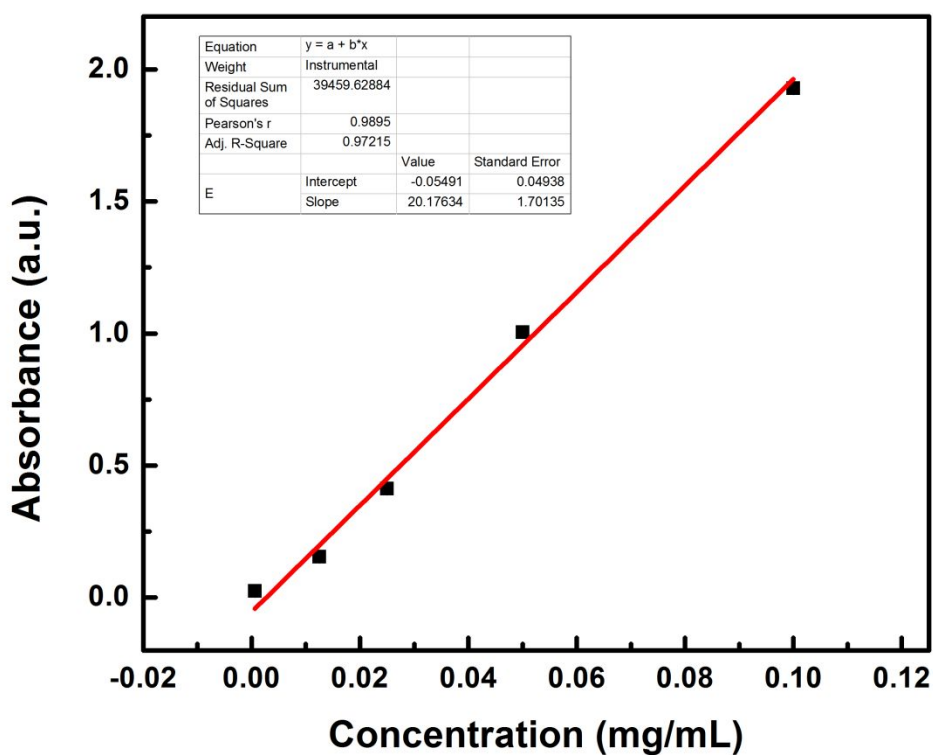

Figure S1. Calibration curve for DEX standard solution by UV-vis spectra

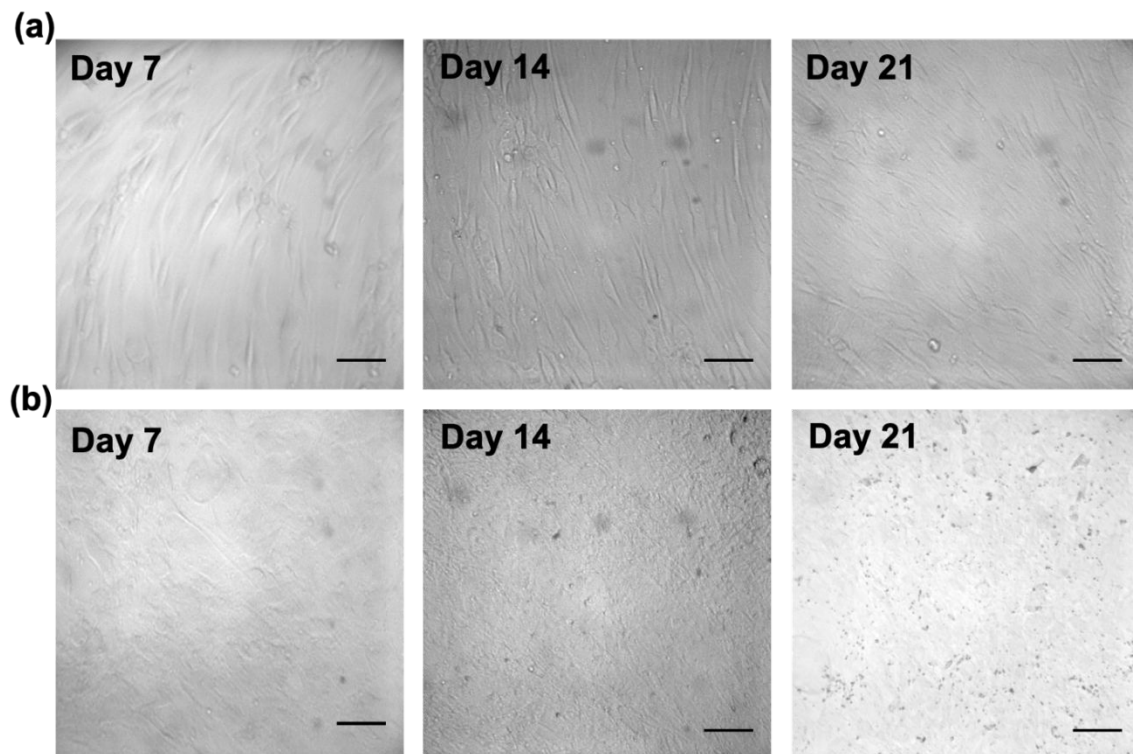

Figure S2. All cell groups were cultured with supernatant from DEX-loaded light-responsive microgels in basal medium (a) without UV-irradiation (b) with UV-irradiation. All of the images were collected using an inverted phase-contrast microscope. (Scale bar = 50 micron)

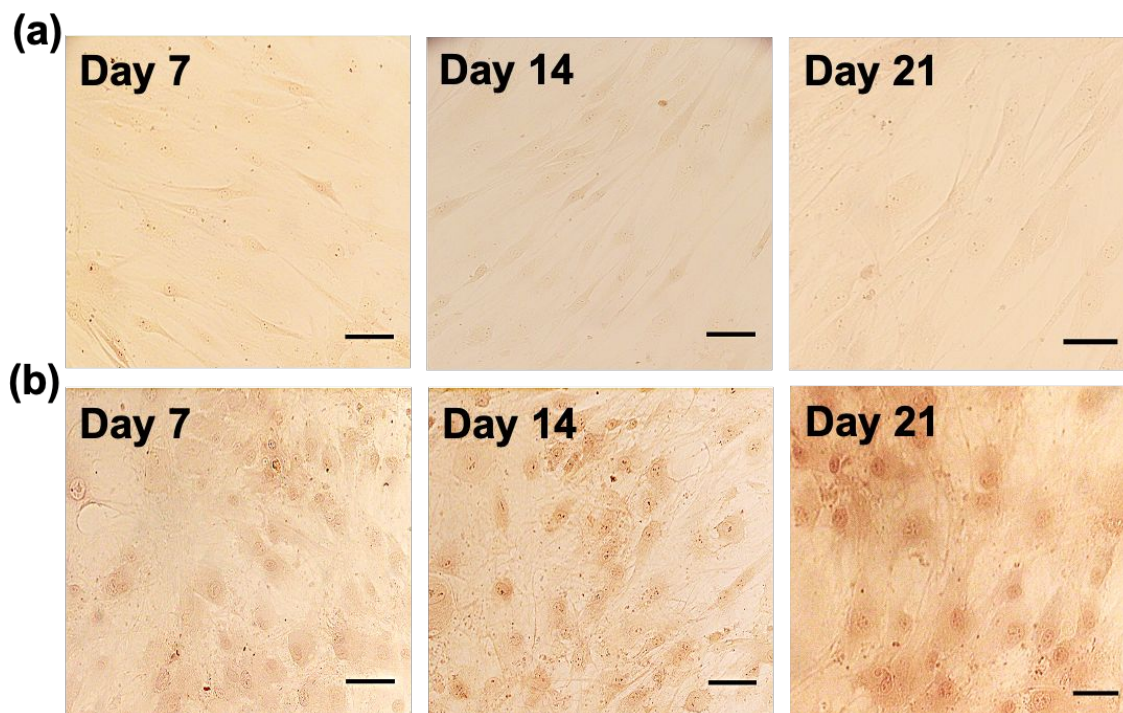

Figure S3. Evaluation of the mineralized extracellular matrix produced by Alizarin Red S staining. All cell groups were cultured with supernatant from DEX-loaded light-responsive microgels in basal medium (a) without UV-irradiation (b) with UV-irradiation. (Scale bar = 50 micron)
